# Supplementary material
Source: HighWire-hosted journal article supplement (http://www.cmaj.ca/highwire/filestream/71435/field_highwire_adjunct_files/4/180551-res-5-at.pdf)
Supplement: 180551-res-5-at.pdf [file 180551-res-5-at.pdf]

## Appendix 5 (as supplied by the authors)

Table 3a. Subdistribution Hazard Model: Intention-to-Treat (ITT) Analyses

| Outcome                             | Crude HR (95% CI)   | Weighted HR (95% CI) |
|-------------------------------------|---------------------|----------------------|
| Fall or major osteoporotic fracture | 0.72 (0.6 to 0.86)  | 0.91 (0.76 to 1.09)  |
| Fall                                | 0.73 (0.61 to 0.88) | 0.94 (0.78 to 1.13)  |
| Major osteoporotic fracture         | 0.82 (0.6 to 1.14)  | 1.06 (0.76 to 1.48)  |
| Hip fracture                        | 0.73 (0.49 to 1.1)  | 0.95 (0.63 to 1.42)  |
| Cataract surgery                    | 0.87 (0.45 to 1.7)  | 0.69 (0.36 to 1.3)   |

Table 3b. Subdistribution Hazard Model: Secondary (Censoring on Switching Exposure Group) Analyses

| Outcome                             | Crude HR (95% CI)   | Weighted HR (95% CI) |
|-------------------------------------|---------------------|----------------------|
| Fall or major osteoporotic fracture | 0.69 (0.57 to 0.82) | 0.86 (0.71 to 1.04)  |
| Fall                                | 0.69 (0.58 to 0.83) | 0.82 (0.73 to 1.07)  |
| Major osteoporotic fracture         | 0.75 (0.54 to 1.04) | 0.96 (0.68 to 1.35)  |
| Hip fracture                        | 0.67 (0.44 to 1.0)  | 0.86 (0.56 to 1.3)   |

Abbreviations: hazard ratio (HR), confidence interval (CI)
